# Supplementary material for: GloFAS-ERA5 operational global river discharge reanalysis 1979–present
Source: Copernicus journal article supplement (doi:10.5194/essd-12-2043-2020), 2020-09-07
Supplement: Supplementary file [file essd-12-2043-2020-supplement-title-page.pdf › essd-12-2043-2020-supplement-title-page.pdf]

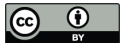

## *Supplement of*

# **GloFAS-ERA5 operational global river discharge reanalysis 1979–present**

**Shaun Harrigan et al.**

*Correspondence to:* Shaun Harrigan ([shaun.harrigan@ecmwf.int](mailto:shaun.harrigan@ecmwf.int))

- `essd-12-2043-2020-supplement-title-page.pdf`
- `Supplementary_Table_S1`
  - `Harrigan_et_al_Supplementary_Table_S1.csv`
- `__MACOSX`
  - `._Supplementary_Table_S1`
  - `Supplementary_Table_S1`
    - \* `._Harrigan_et_al_Supplementary_Table_S1.csv`

The copyright of individual parts of the supplement might differ from the CC BY 4.0 License.
